# Supplementary material
Source: PubMed Central journal article supplement (PMC4378356)
Supplement: Supp_Figure1.pdf [file Supp_Figure1.pdf]

## Supplementary Data

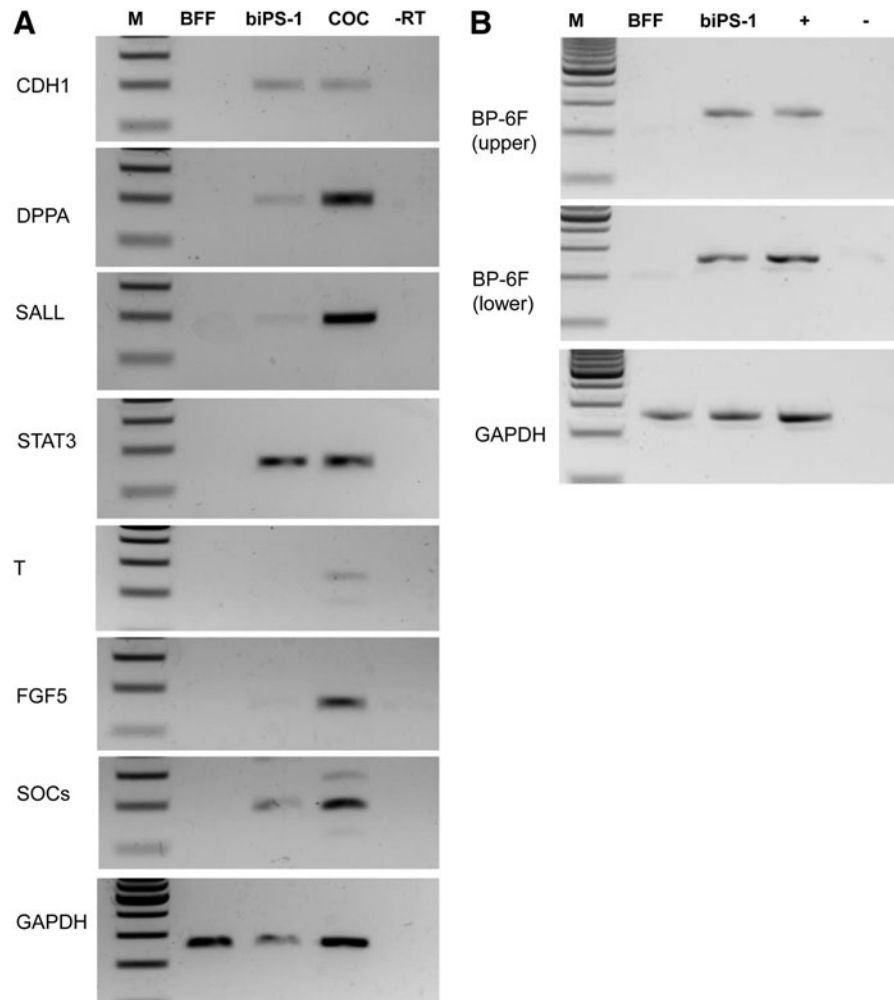

**SUPPLEMENTARY FIG. S1.** Expression analysis of biPS-1 for further stem cell-related transcripts and transposon transcript. (A) RT-PCR analysis of stemness-related gene transcripts. (B) RT-PCR analysis of transposon multigene transcript with two primer pairs.
