# Supplementary material
Source: PubMed Central journal article supplement (PMC4378356)
Supplement: Supp_Figure3.pdf [file Supp_Figure3.pdf]

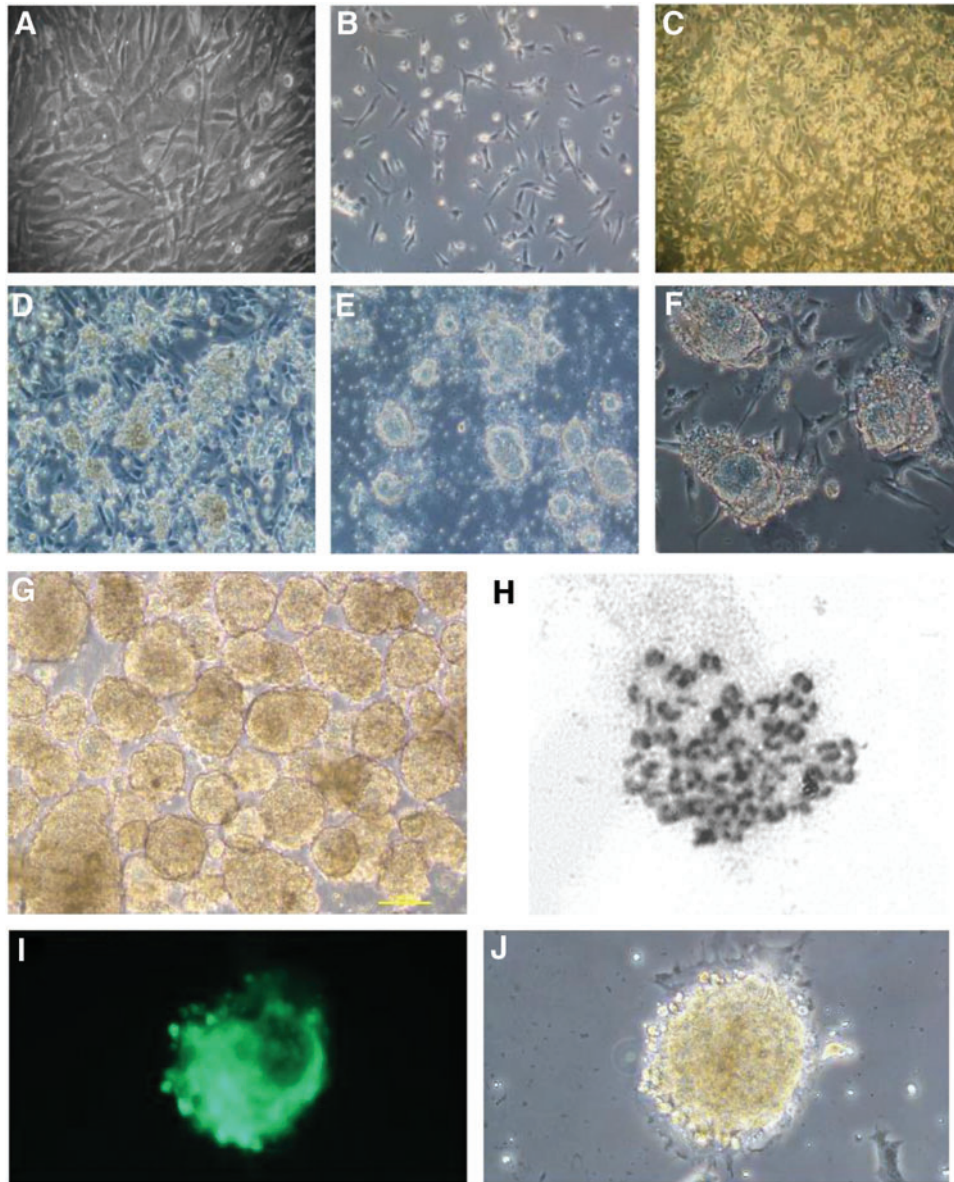

**SUPPLEMENTARY FIG. S3.** Timeline of bovine iPSC development and characterization of biPS-1 cells. **(A)** Bovine fetal fibroblasts before electroporation. **(B)** Bovine fetal fibroblasts after the day of electroporation. **(C)** biPS-1 at day 14. **(D)** biPS-1 at day 18. **(E)** biPS-1 at day 24 to 26. **(F)** biPS-1 at passage 10. **(G)** EB Formation of biPS-1 (*in vitro* differentiation). **(H)** Karyogram of biPS-1 at P27 showing normal karyotype. **(I)** Venus positive biPS-1 (under epifluorescence illumination). **(J)** Corresponding brightfield view.
