# Supplementary material
Source: PubMed Central journal article supplement (PMC4378356)
Supplement: Supp_Figure4.pdf [file Supp_Figure4.pdf]

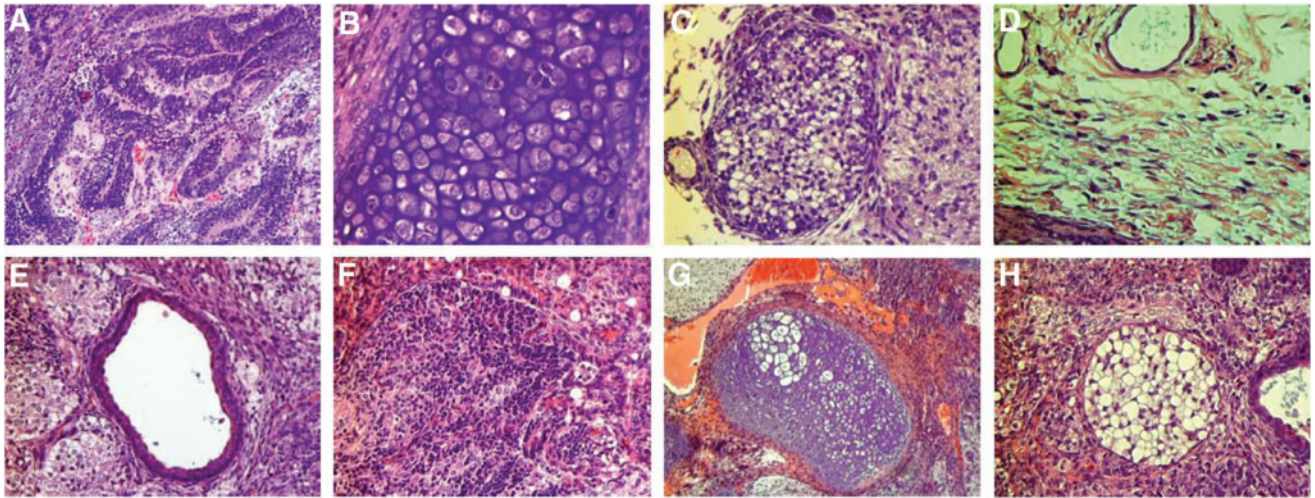

**SUPPLEMENTARY FIG. S4.** Histology of teratoma tissue. (A–H) Various differentiated cell types comprising of three germ layers.
