# Supplementary material
Source: PubMed Central journal article supplement (PMC4378356)

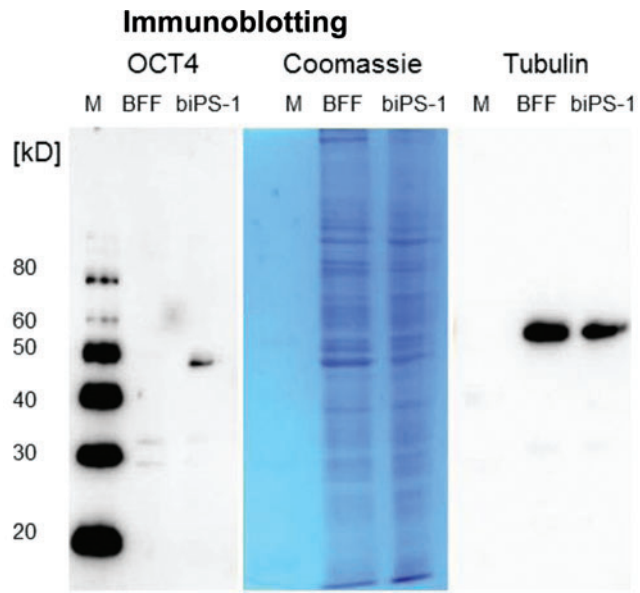

**SUPPLEMENTARY FIG. S2.** Western blot analysis of OCT4 protein.

Supplement: Supp_Figure2.pdf [file Supp_Figure2.pdf]
